# Supplementary material for: Propiece IL-1α facilitates the growth of acute T-lymphocytic leukemia cells through the activation of NF-κB and SP1
Source: PubMed Central journal article supplement (PMC5362515; doi:10.18632/oncotarget.14934), 2017-02-01
Supplement: oncotarget-08-15677-s001.pdf [file oncotarget-08-15677-s001.pdf]

# Propiece IL-1 $\alpha$ facilitates the growth of acute T-lymphocytic leukemia cells through the activation of NF- $\kappa$ B and SP1

## SUPPLEMENTARY FIGURE AND TABLES

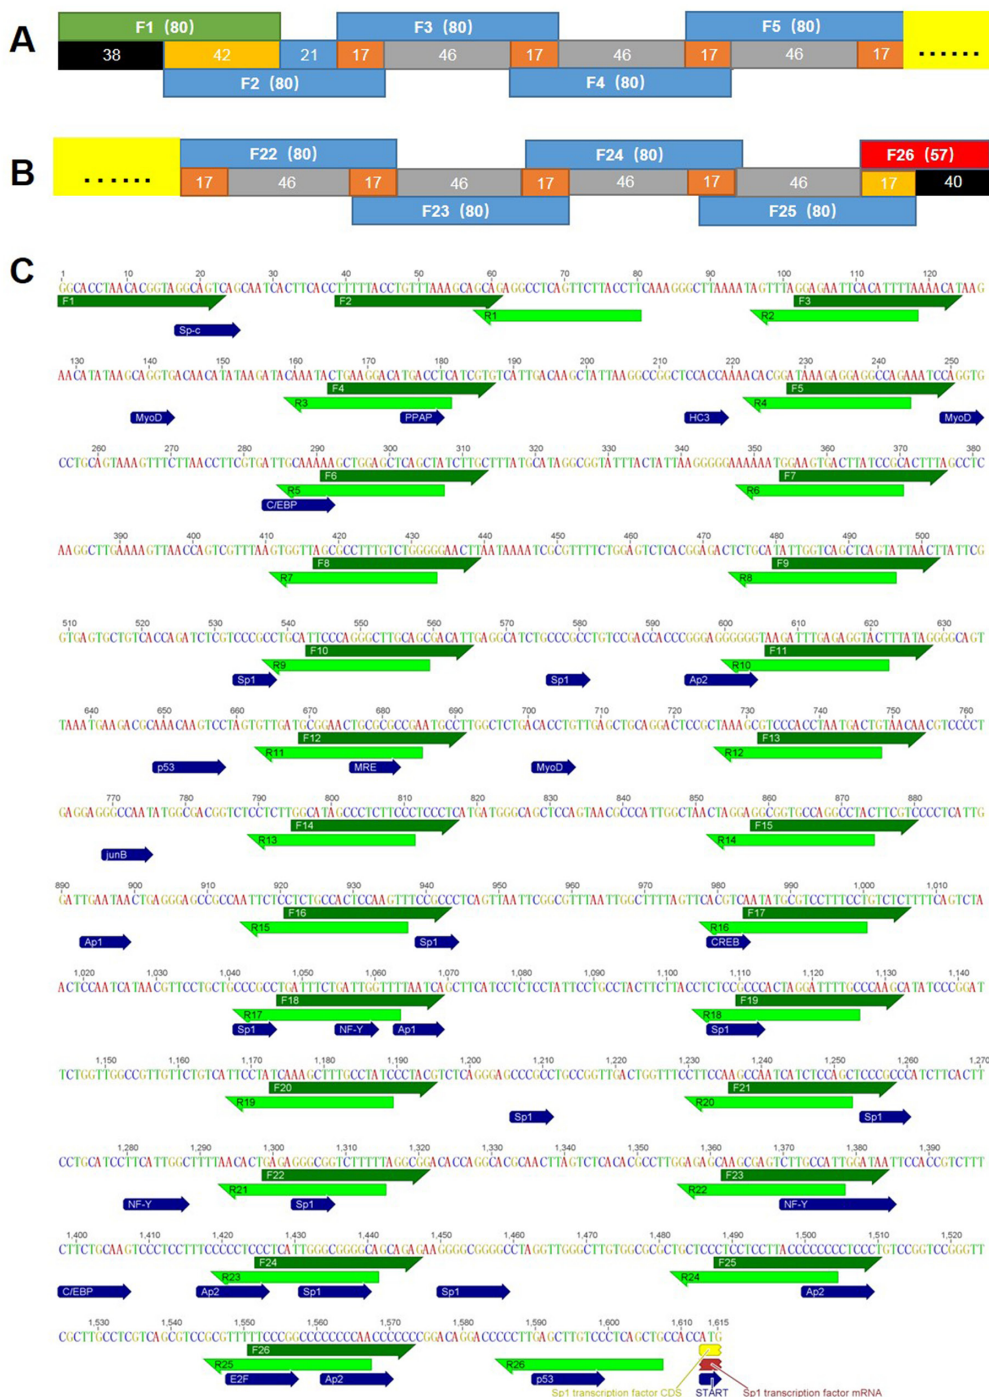

**Supplementary Figure 1: Schematic map of SP1 mini library.** A. The 5'-end of distribution of the fragments of the mini library. B. The 3'-end of distribution of the fragments of the mini library. C. The schematic map of all fragments distribution in mini library. Known transcription factor binding sites are also shown.

**Supplementary Table 1: Primer sequences for cloning human and murine IL-1 $\alpha$  propiece**

| Primers                                          | Sequence                     |
|--------------------------------------------------|------------------------------|
| Forward primer for human IL-1 $\alpha$ propiece  | GTCGAGCTCGATGGCCAAAGTTCC     |
| Reverse primer for human IL-1 $\alpha$ propiece  | GTCGAGCTCGATGGCCAAAGTTCC     |
| Forward primer for murine IL-1 $\alpha$ propiece | CCGGAATTCCGGCCACCATGGACT     |
| Reverse primer for murine IL-1 $\alpha$ propiece | CGCGGATCCGCGTTATTTTTCGAACTGC |

**Supplementary Table 2: Sequences of cloned and recombinant constructs\*.**

See Supplementary File 1

**Supplementary Table 3: Primer sequences for constructing Sp1 promoter regions**

| Primers | Sequence                                   |
|---------|--------------------------------------------|
| Fwd1:   | 5'-tcaagtcaggctageGGGCTTGTGGCGCGCTGCTC-3'  |
| Fwd2:   | 5'-tcaagtcaggctageCTATCAAAGCTTTGCCTATCC-3' |
| Fwd3:   | 5'-tcaagtcaggctageGGCACCTAACACGGTAGGCAG-3' |
| Rev:    | 5'-cagtgcctcgagGCTCAAGGGGGTCTGTCCGG-3'     |

**Supplementary Table 4: Primer sequences for constructing Sp1 mini library.**

See Supplementary File 2
